# Supplementary material for: Protein profiling and network enrichment analysis in individuals before and after the onset of rheumatoid arthritis
Source: PubMed Central journal article supplement (PMC6915963; doi:10.1186/s13075-019-2066-9), 2019-12-16

**HPA001302 (CASP8)**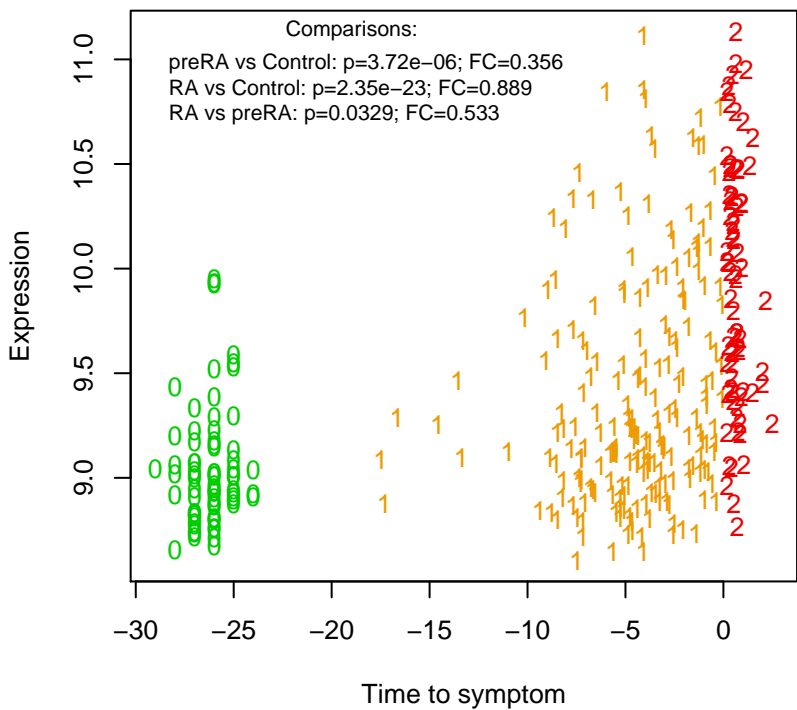**HPA058346 (CCDC85C)**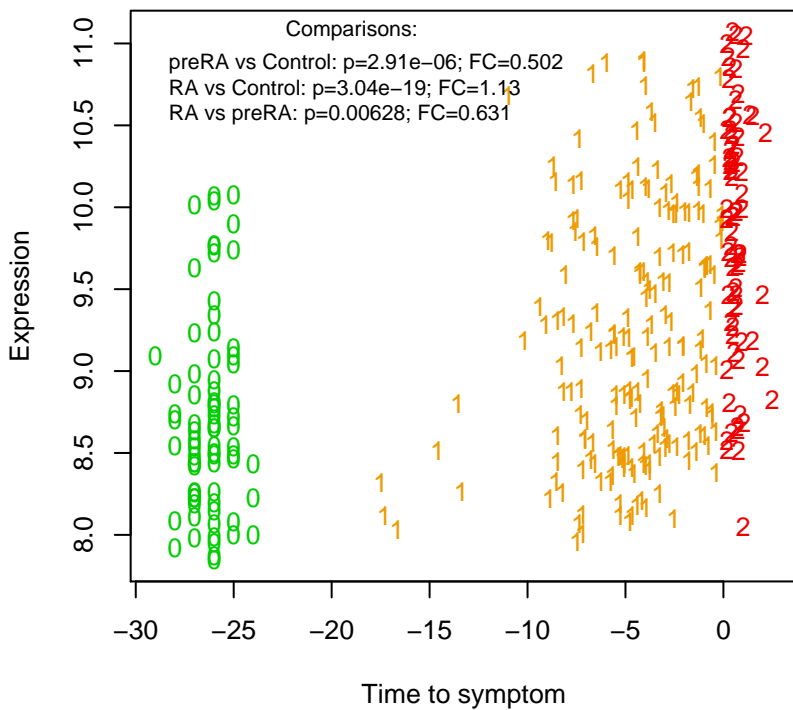**HPA019142 (COL6A1)**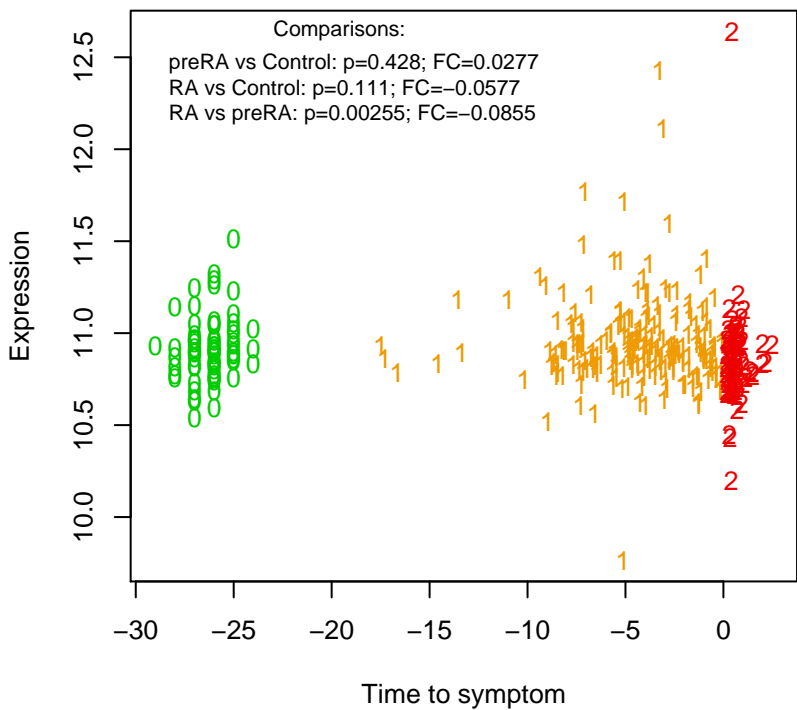**HPA039288 (CSF2)**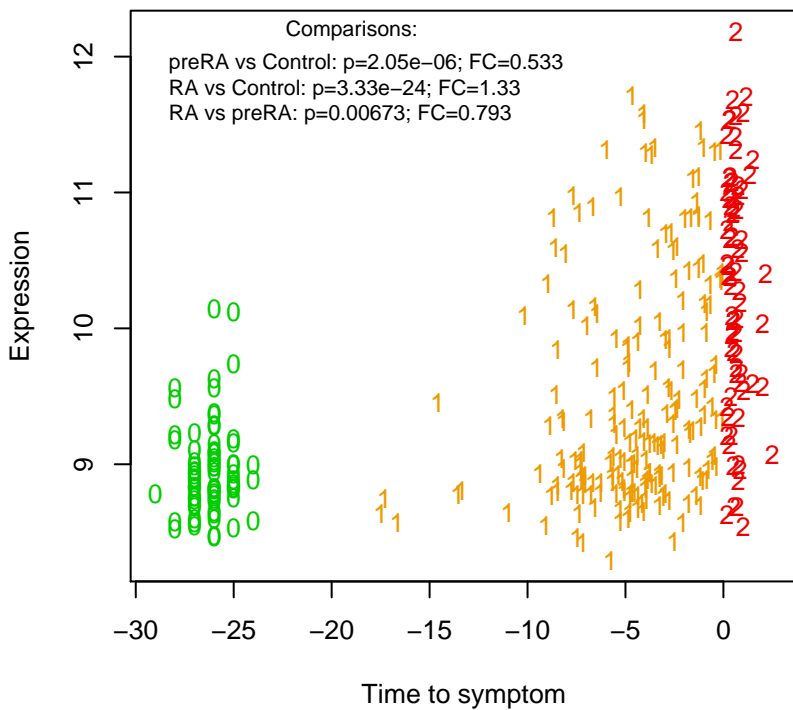

**HPA049265 (DSC3)**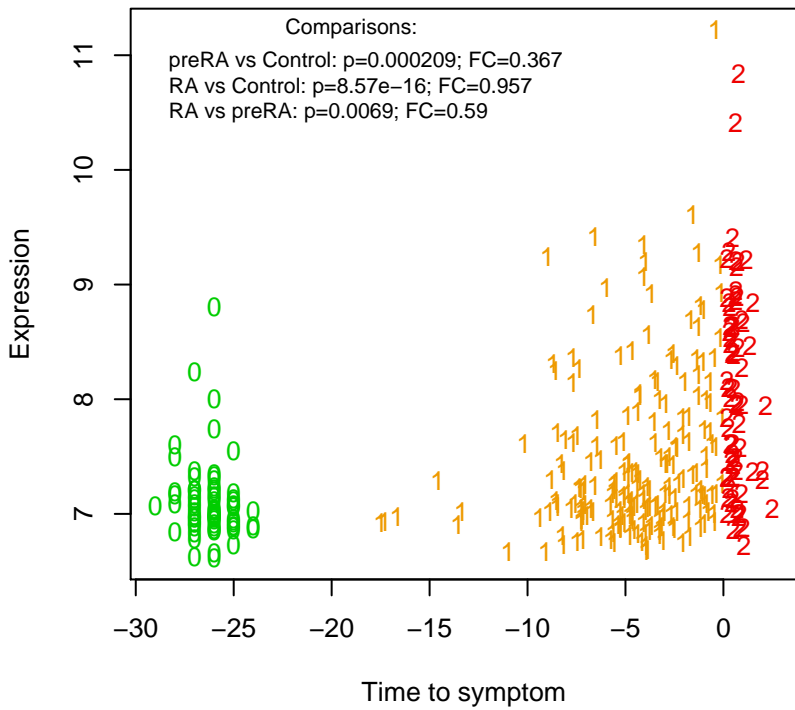**HPA037564 (EPB41L5)**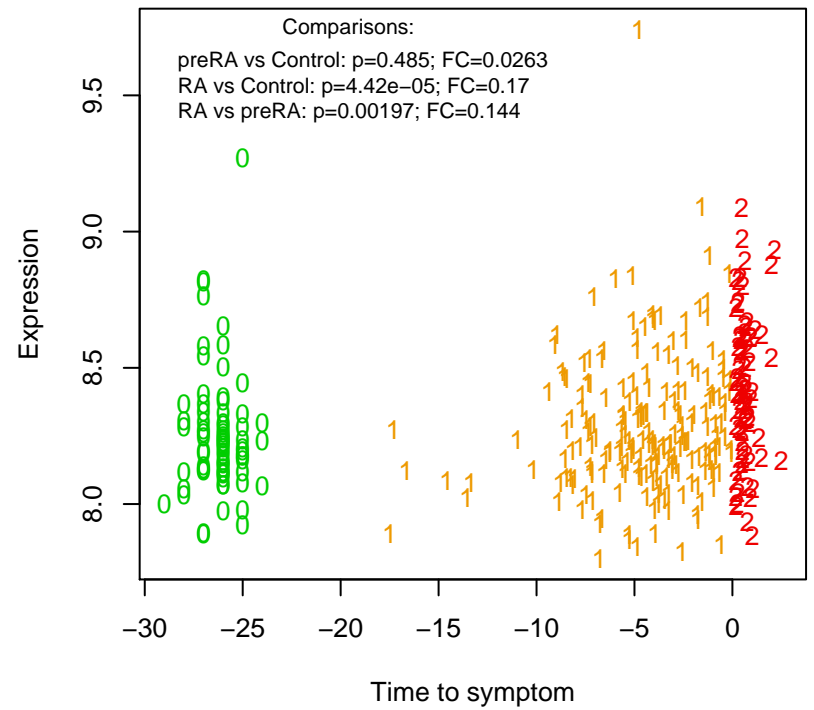**HPA065797 (FAM81A)**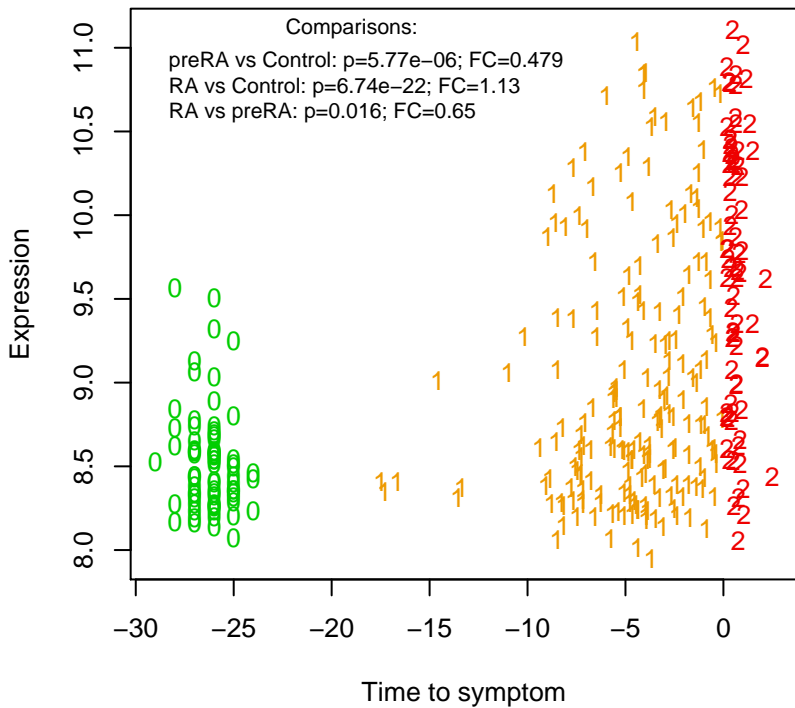**HPA002184 (HTRA1)**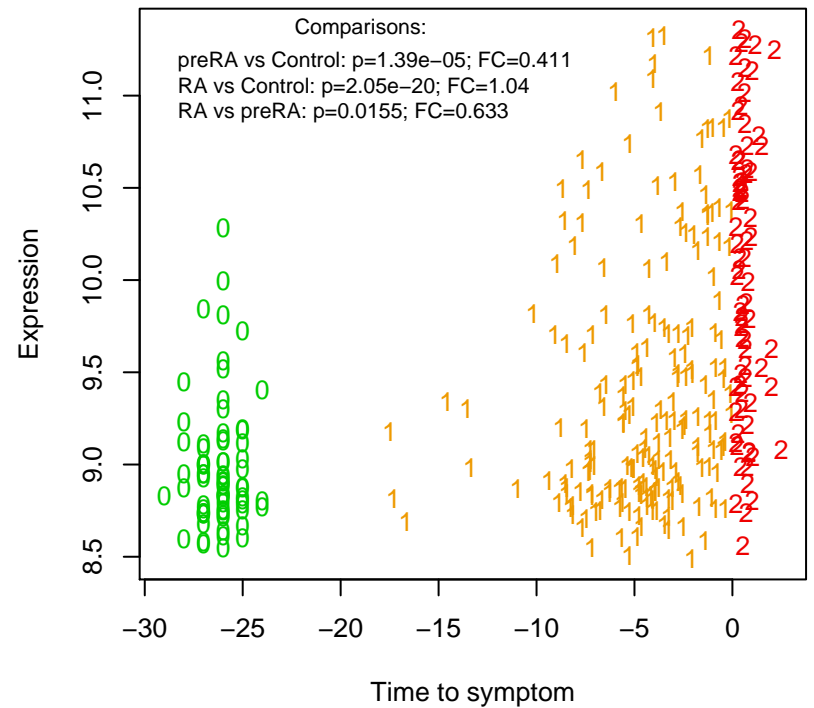

### HPA052386 (IL33)

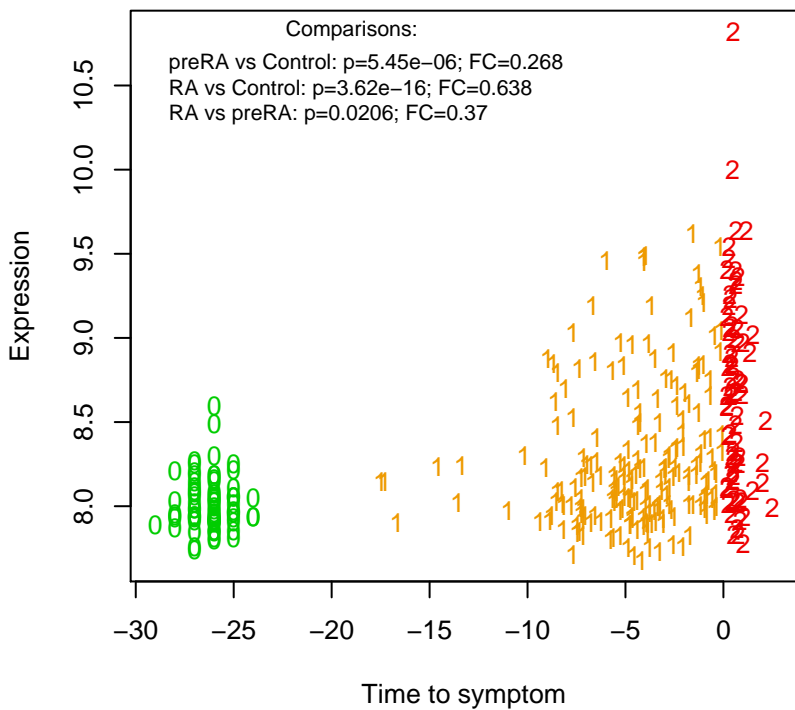

### HPA070273 (KCNB2)

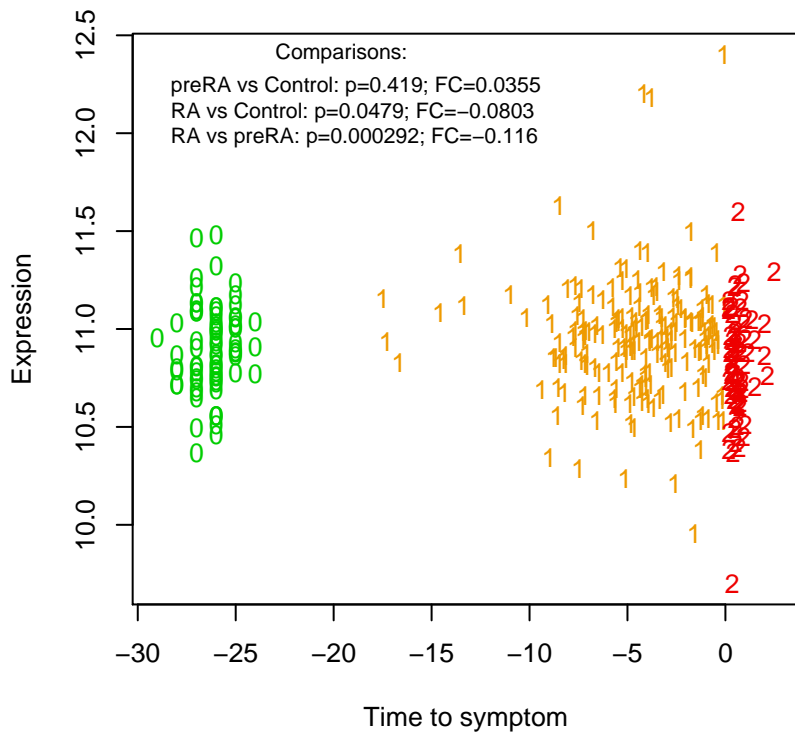

### HPA052343 (MMP10)

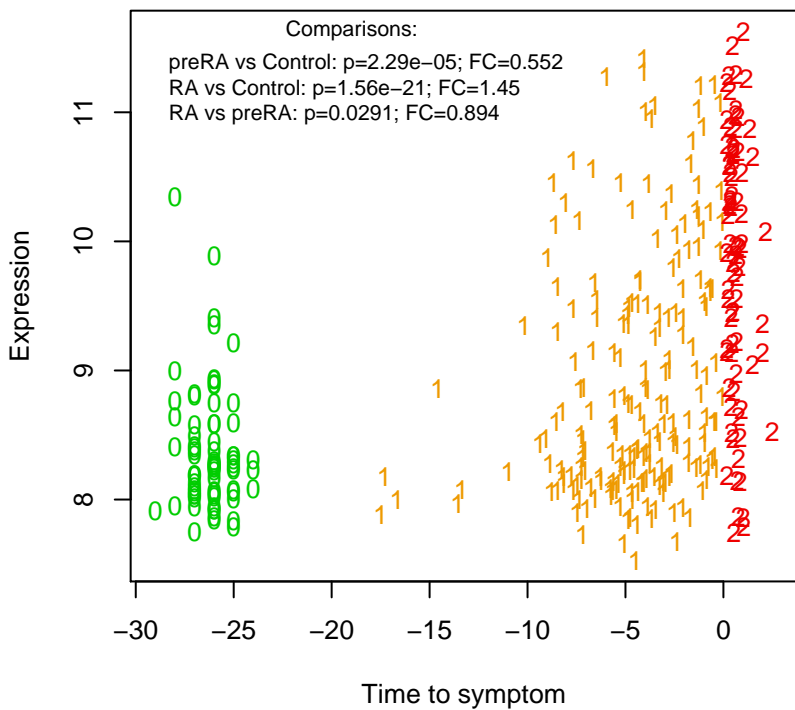

### HPA053433 (MMP10)

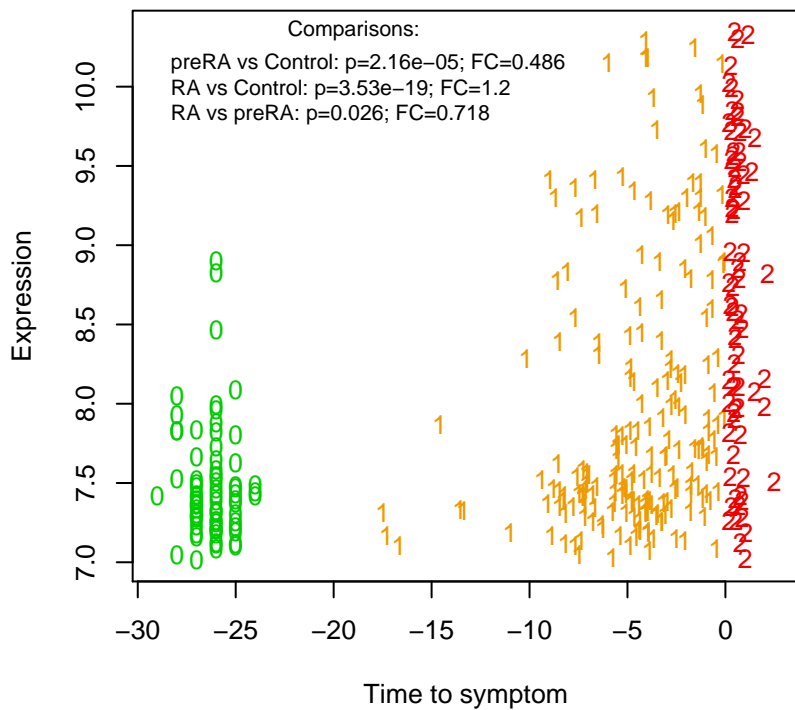

**HPA047725 (ORM1,ORM2)**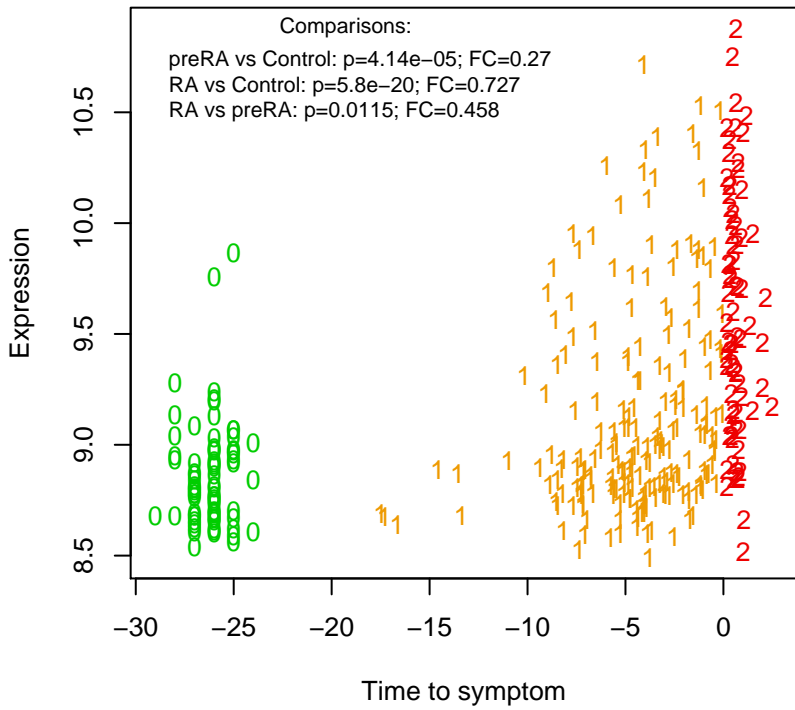**HPA049254 (PRR16)**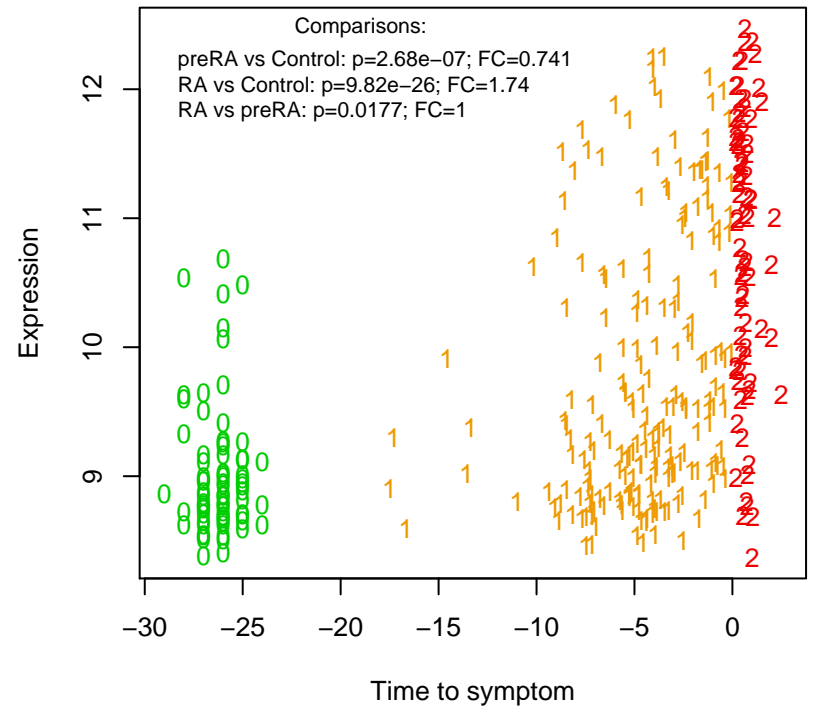**HPA002881 (S100A12)**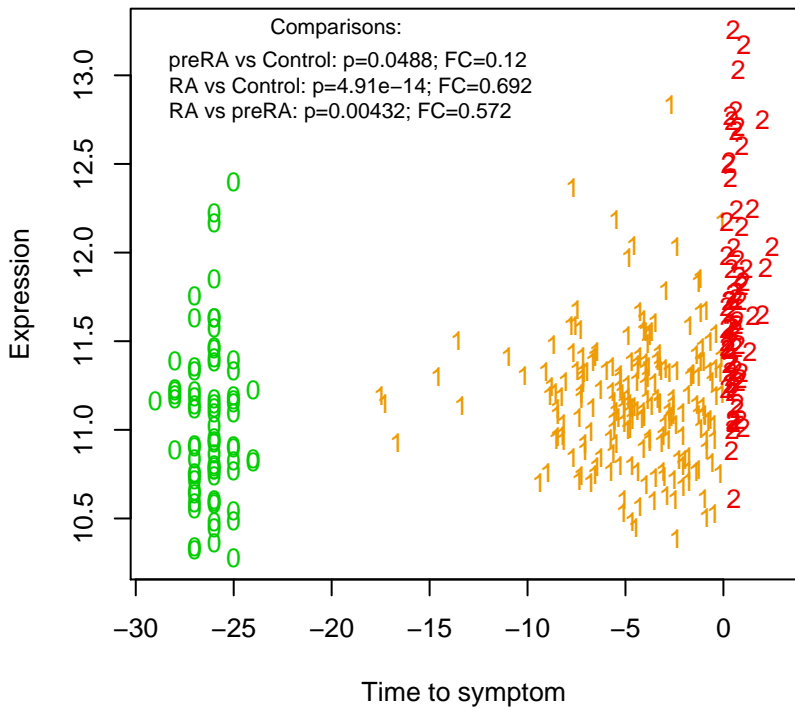**HPA003620 (S100A12)**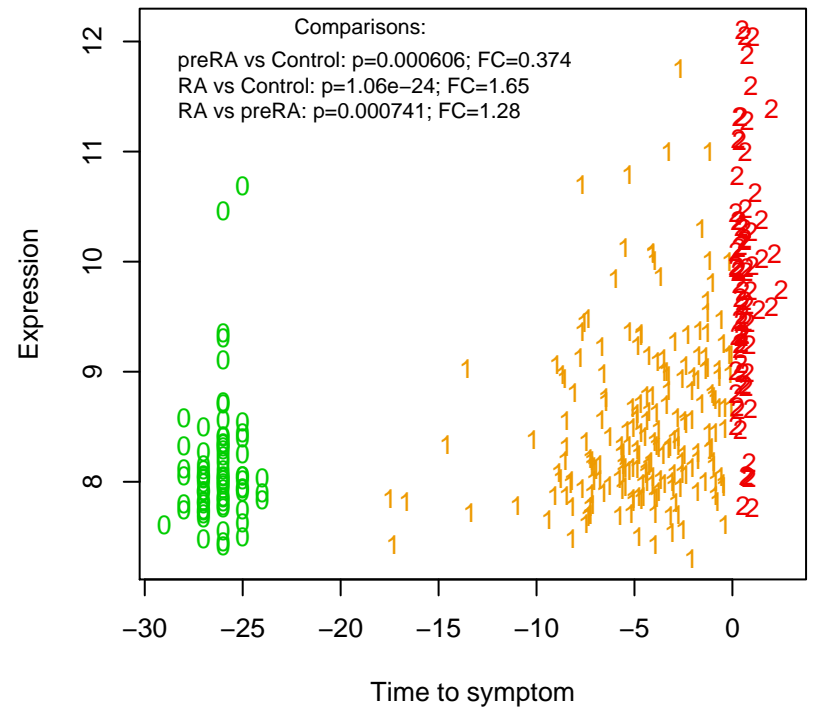

### HPA027227 (SELE)

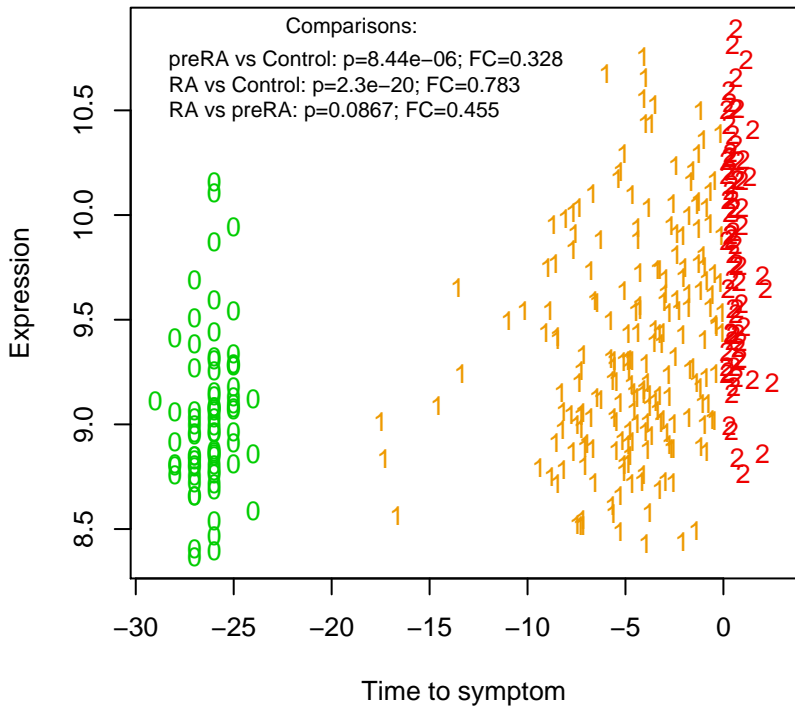

### HPA068540 (SLC11A1)

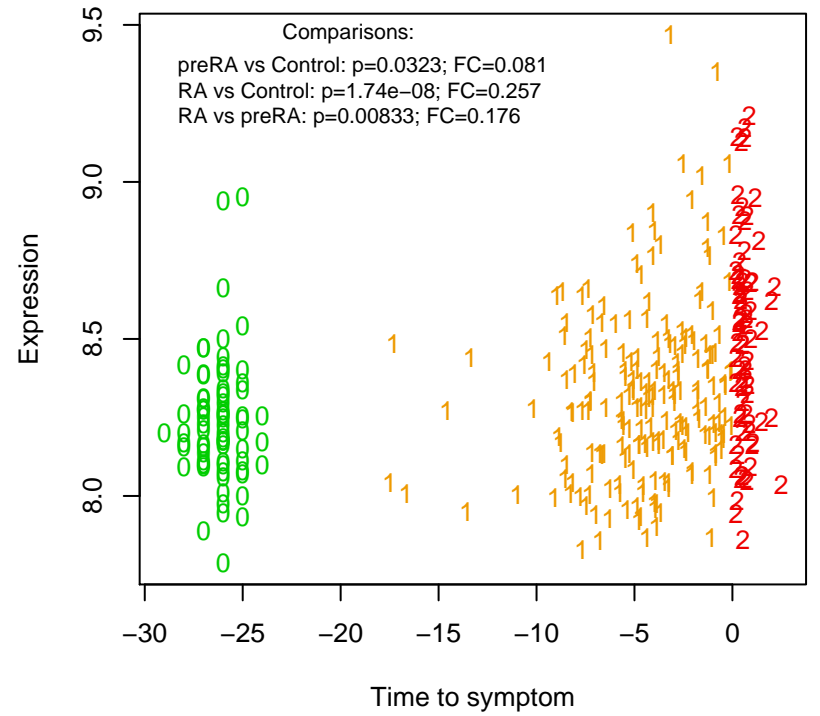

### HPA063582 (TGFB3)

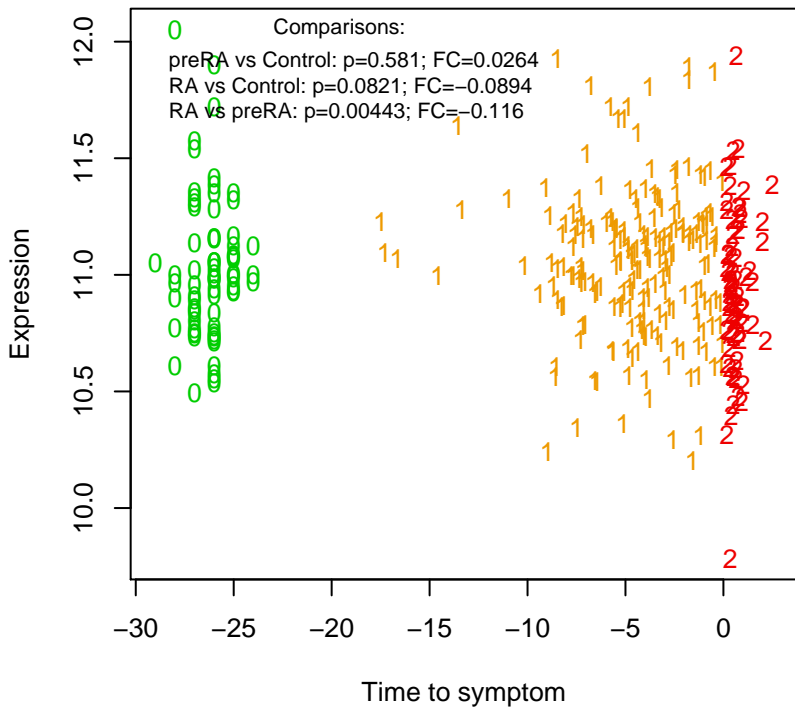

### HPA064998 (TNF)

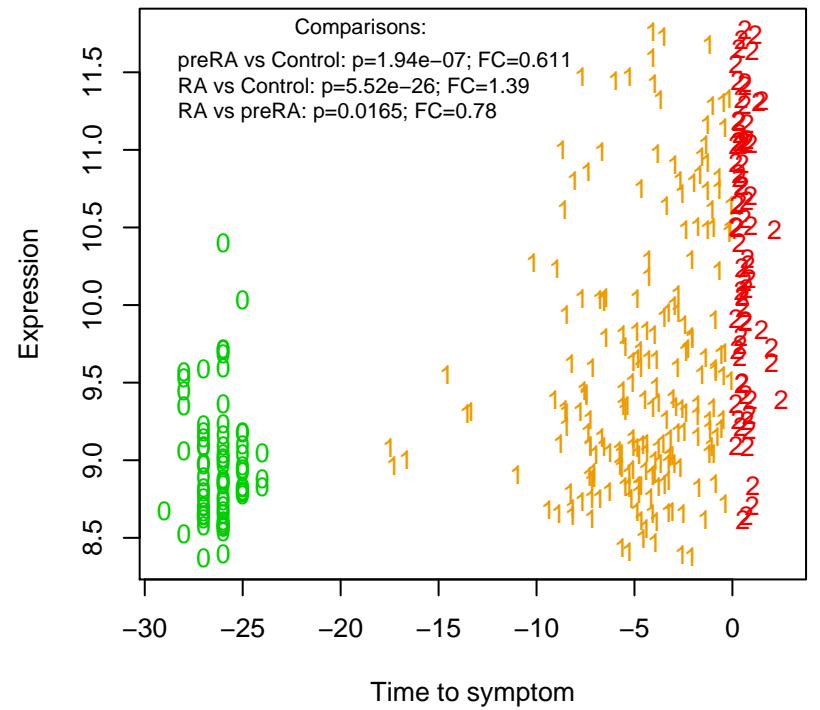

# HPA061732 (ZNF618)

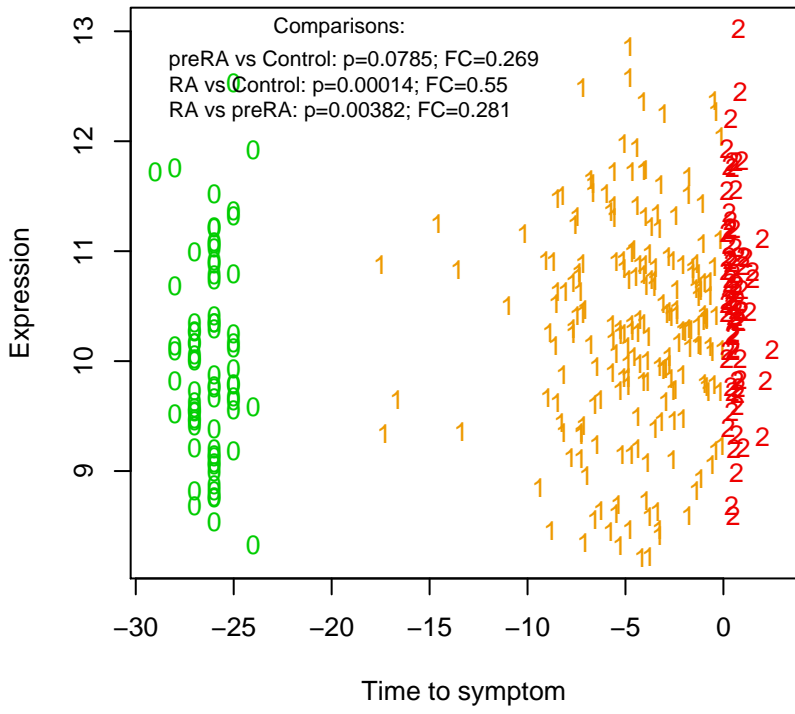

Supplement: 13075_2019_2066_MOESM4_ESM.pdf [file 13075_2019_2066_MOESM4_ESM.pdf]
